# Supplementary material
Source: PubMed Central journal article supplement (PMC8661017)
Supplement: mmc1.pdf [file mmc1.pdf]

## SUPPORTING INFORMATION

**Tumor suppressor p53 promotes ferroptosis in oxidative stress conditions independent of modulation of ferroptosis by p21, CDKs, Rb and E2F.**

Nishanth Kuganesan, Samkeliso Dlamini, LM Viranga Tillekeratne and William R Taylor

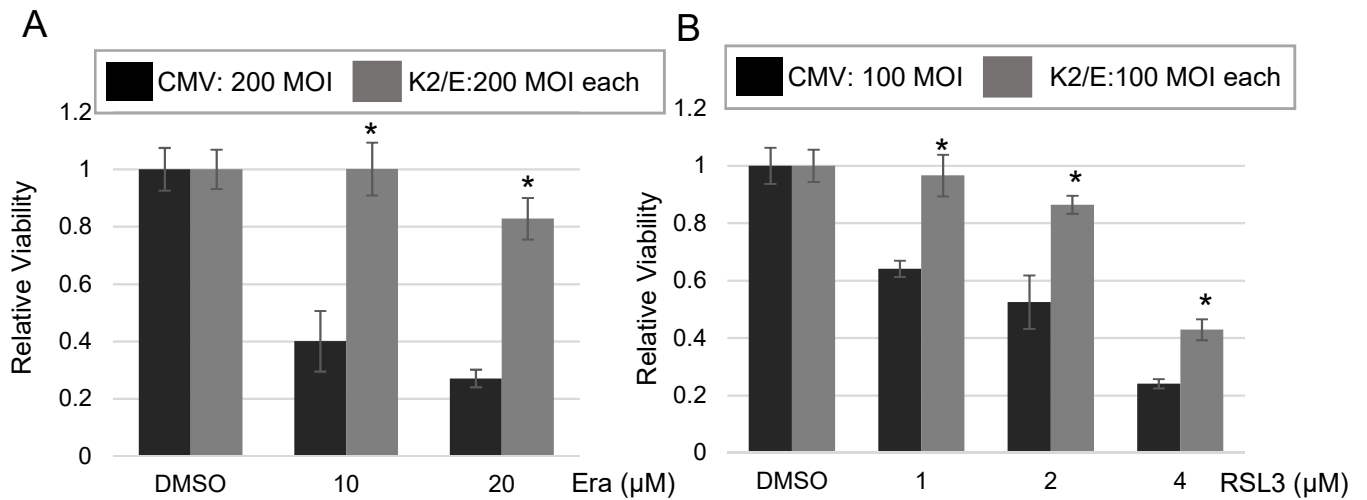

**S. Fig1. CDK2|CycE overexpression inhibits ferroptosis induced by RSL3 or Erastin in NARF2 cells.** NARF2 pBpuro cells were transduced with CMV or CDK2/CycE adenoviruses for 48h at the indicated MOI. After that, cells were treated with Erastin or RSL3 as mentioned for 48 h and viability was measured using methylene blue. \* $p < 0.05$  based on comparing CMV to K2/E infected samples using a student's t test.
